# Supplementary material for: Reverse-Engineering Post-Transcriptional Regulation of Gap Genes in Drosophila melanogaster
Source: PubMed Central journal article supplement (PMC3814631; doi:10.1371/journal.pcbi.1003281), 2013-10-31
Supplement: pcbi.1003281.s006.pdf [file pcbi.1003281.s006.pdf]

Supplementary Figure S6: Parameter estimation with fixed delays.

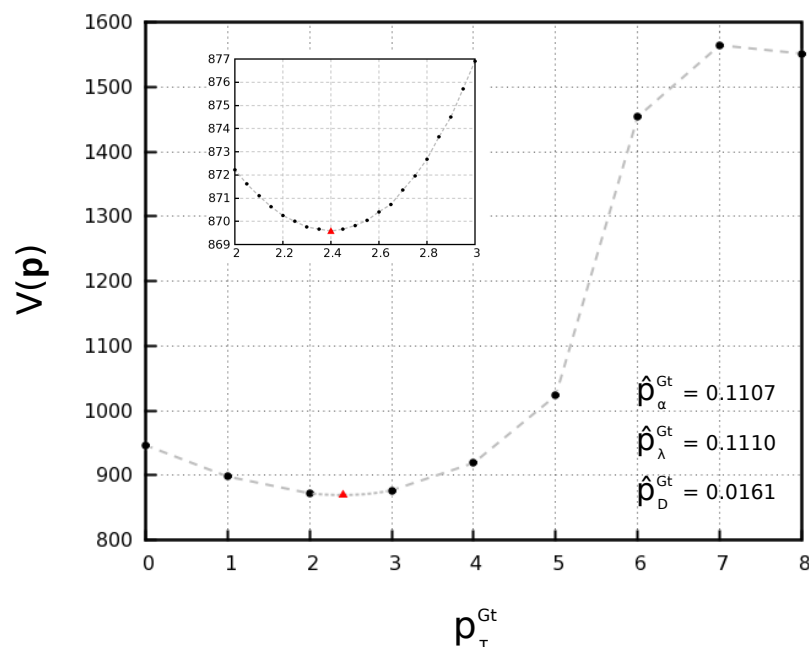

**Figure S6. Parameter estimation with fixed delays.** In order to test whether we can determine the value of delay parameters  $\tau$  correctly, we performed a series of runs for the *gt* model, fixing  $\tau_{\text{Gt}}$  to values between 1.00 and 8.00 min (with a step size of 1.00 min between series of optimisation runs). Resulting WLS scores  $V(\mathbf{p})$  are shown as black dots. For comparison, the red triangle indicates the WLS score of the model obtained by estimating  $\tau_{\text{Gt}}$ . The inset shows a detailed view of the interval between 2.00 and 3.00 which we sampled more intensively, with a step size of 0.05. Optimal parameter values (for red-triangle solutions) are indicated on the right.
