# Supplementary material for: Reverse-Engineering Post-Transcriptional Regulation of Gap Genes in Drosophila melanogaster
Source: PubMed Central journal article supplement (PMC3814631; doi:10.1371/journal.pcbi.1003281), 2013-10-31
Supplement: pcbi.1003281.s007.pdf [file pcbi.1003281.s007.pdf]

Supplementary Table S1: Comparison of domain position and width.

|                    | Time | $\mu(x_{max})$ | $\sigma^2(x_{max})$ | $\mu(x_A)$ | $\sigma^2(x_A)$ | $\mu(x_P)$ | $\sigma^2(x_P)$ | $\mu(x_{width})$ | $\sigma^2(x_{width})$ |
|--------------------|------|----------------|---------------------|------------|-----------------|------------|-----------------|------------------|-----------------------|
|                    |      |                |                     |            |                 |            |                 |                  |                       |
| <i>Kr</i> mRNA     | T1   | 52.57          | 4.88                | 44.95      | 6.10            | 60.22      | 2.31            | 15.27            | 4.75                  |
|                    | T2   | 52.49          | 1.82                | 45.03      | 2.22            | 60.33      | 2.31            | 15.30            | 3.63                  |
|                    | T3   | 52.26          | 3.55                | 45.06      | 2.29            | 60.30      | 4.99            | 15.24            | 2.41                  |
|                    | T4   | 51.55          | 2.44                | 45.00      | 2.04            | 59.06      | 2.31            | 14.07            | 1.76                  |
|                    | T5   | 50.18          | 3.11                | 44.39      | 2.14            | 56.78      | 4.73            | 12.39            | 2.01                  |
|                    | T6   | 49.44          | 1.94                | 43.83      | 1.88            | 55.16      | 2.22            | 11.32            | 0.84                  |
|                    | T7   | 48.54          | 2.10                | 42.65      | 1.59            | 54.07      | 2.86            | 11.42            | 1.91                  |
|                    | T8   | 48.20          | 3.89                | 42.90      | 5.03            | 53.46      | 3.45            | 10.56            | 1.16                  |
| <i>Kr</i> Protein  | T1   | 53.50          | 4.26                | 44.33      | 5.66            | 62.40      | 2.10            | 18.08            | 3.41                  |
|                    | T2   | 52.51          | 1.58                | 43.84      | 2.87            | 61.30      | 1.76            | 17.46            | 3.74                  |
|                    | T3   | 52.15          | 1.69                | 44.39      | 1.93            | 60.16      | 1.55            | 15.77            | 1.21                  |
|                    | T4   | 52.13          | 1.29                | 44.22      | 1.53            | 60.11      | 1.44            | 15.89            | 1.08                  |
|                    | T5   | 51.62          | 0.95                | 43.91      | 1.06            | 59.56      | 1.10            | 15.65            | 0.82                  |
|                    | T6   | 51.15          | 0.70                | 43.61      | 1.26            | 59.19      | 1.41            | 15.57            | 1.31                  |
|                    | T7   | 50.18          | 1.49                | 43.22      | 1.45            | 57.87      | 2.04            | 14.64            | 2.01                  |
|                    | T8   | 49.89          | 0.90                | 43.28      | 1.19            | 57.16      | 2.01            | 13.88            | 1.66                  |
| <i>kni</i> mRNA    | T1   | 65.13          | 2.45                | 59.87      | 3.84            | 70.81      | 5.36            | 10.94            | 5.96                  |
|                    | T2   | 64.93          | 5.18                | 59.55      | 2.02            | 70.43      | 5.83            | 10.88            | 3.66                  |
|                    | T3   | 64.01          | 2.31                | 58.70      | 1.61            | 69.11      | 3.38            | 10.41            | 2.22                  |
|                    | T4   | 63.38          | 2.83                | 58.81      | 2.19            | 67.75      | 3.40            | 8.94             | 1.27                  |
|                    | T5   | 61.60          | 2.85                | 57.25      | 1.88            | 65.81      | 2.36            | 8.56             | 1.16                  |
|                    | T6   | 60.18          | 1.53                | 55.86      | 1.95            | 64.17      | 3.24            | 8.31             | 3.83                  |
|                    | T7   | 61.32          | 5.68                | 56.43      | 6.61            | 65.99      | 35.49           | 9.56             | 33.75                 |
|                    | T8   | 60.52          | 4.24                | 53.37      | 55.31           | 65.29      | 0.53            | 11.93            | 58.53                 |
| <i>kni</i> Protein | T1   | 65.79          | 1.32                | 58.81      | 0.86            | 73.97      | 1.43            | 15.16            | 1.00                  |
|                    | T2   | 64.66          | 1.39                | 58.44      | 1.24            | 71.22      | 1.51            | 12.78            | 0.75                  |
|                    | T3   | 64.80          | 0.94                | 59.01      | 0.92            | 70.68      | 1.03            | 11.67            | 1.16                  |
|                    | T4   | 64.03          | 0.65                | 58.82      | 1.09            | 69.82      | 0.77            | 11.00            | 0.62                  |
|                    | T5   | 63.81          | 0.90                | 58.39      | 0.99            | 69.38      | 1.39            | 10.98            | 0.61                  |
|                    | T6   | 63.57          | 0.64                | 58.39      | 0.79            | 68.99      | 1.13            | 10.61            | 0.63                  |
|                    | T7   | 63.06          | 1.09                | 57.85      | 0.79            | 68.34      | 1.08            | 10.50            | 0.26                  |
|                    | T8   | 62.60          | 0.84                | 57.14      | 0.60            | 67.65      | 1.03            | 10.52            | 0.69                  |
| <i>gt</i> mRNA     | T1   | 75.67          | 5.30                | 68.72      | 3.12            | 82.65      | 5.43            | 13.93            | 4.68                  |
|                    | T2   | 74.28          | 2.16                | 68.06      | 0.67            | 79.51      | 1.89            | 11.45            | 1.23                  |
|                    | T3   | 72.38          | 1.92                | 67.16      | 1.36            | 77.58      | 2.57            | 10.42            | 1.79                  |
|                    | T4   | 72.14          | 2.61                | 67.45      | 2.49            | 77.21      | 2.78            | 9.76             | 1.60                  |
|                    | T5   | 70.85          | 2.42                | 66.68      | 2.33            | 75.59      | 3.02            | 8.91             | 1.20                  |
|                    | T6   | 69.55          | 1.51                | 65.71      | 1.35            | 73.56      | 2.52            | 7.85             | 1.65                  |
|                    | T7   | 68.26          | 1.79                | 64.08      | 1.49            | 71.88      | 1.73            | 7.80             | 1.31                  |
|                    | T8   | 68.08          | 1.65                | 63.79      | 1.92            | 71.97      | 2.81            | 8.18             | 4.74                  |
| <i>Gt</i> Protein  | T1   | 81.00          | 6.13                | 72.67      | 2.44            | 90.12      | 8.82            | 17.55            | 7.57                  |
|                    | T2   | 77.78          | 4.77                | 71.01      | 2.93            | 84.76      | 2.31            | 14.00            | 3.23                  |
|                    | T3   | 75.00          | 0.99                | 69.33      | 1.06            | 82.26      | 3.19            | 12.92            | 4.29                  |
|                    | T4   | 74.14          | 2.16                | 68.67      | 1.34            | 79.77      | 3.27            | 11.09            | 1.04                  |
|                    | T5   | 73.00          | 1.54                | 68.01      | 0.93            | 78.48      | 2.18            | 10.47            | 1.34                  |
|                    | T6   | 72.22          | 1.20                | 67.32      | 0.88            | 77.51      | 1.78            | 10.19            | 0.68                  |
|                    | T7   | 71.35          | 1.32                | 66.82      | 0.89            | 76.36      | 1.15            | 9.54             | 0.23                  |
|                    | T8   | 70.66          | 1.35                | 66.29      | 1.16            | 75.48      | 1.50            | 9.19             | 0.30                  |

**Table S1. Comparison of domain position and width between mRNA and protein data.** Mean ( $\mu$ ) and variances ( $\sigma^2$ ) of the position of expression peaks ('max'), domain boundary positions ('A', anterior; 'P', posterior), and domain widths are shown for the central domain of *Kr* (green), the abdominal domain of *kni* (red), and the posterior domain of *gt* (blue).
